# Supplementary material for: Coral Disease Time Series Highlight Size-Dependent Risk and Other Drivers of White Syndrome in a Multi-Species Model
Source: Frontiers journal article supplement (doi:10.3389/fmars.2020.601469), 2020-12-08
Supplement: Table_1.DOCX [file Table_1.DOCX]

Supplemental Table 1: Table of species codes used in survey data and corresponding scientific names. Species appearing in the consensus dataset have had their code and scientific name bolded.

| **Species Code** | **Scientific Name** | **Species Code** | **Scientific Name** |
| --- | --- | --- | --- |
| AECH | *Acanthastrea echinata* | LHAT | *Lobophyllia hatai* |
| AHIL | *Acanthastrea hillae* | LHEM | *Lobophyllia hemprichii* |
| ACSP | *Acanthastrea species* | LOSP | *Lobophyllia species* |
| AABR | *Acropora abrotanoides* | **PMAS** | ***massive Porites*** |
| AACU | *Acropora acuminata* | MAMP | *Merulina ampliata* |
| **AASP** | ***Acropora aspera*** | MESP | *Merulina species* |
| AAUS | *Acropora austera* | MDIC | *Millepora dichotoma* |
| AAZU | *Acropora azurea* | MPLA | *Millepora platyphylla* |
| ACER | *Acropora cerealis* | MISP | *Millepora species* |
| ACOP | *Acropora cophydactyla* | MTUB | *Millepora tuberosa* |
| ADIG | *Acropora digitifera* | MCUR | *Montastrea curta* |
| AGEM | *Acropora gemmifera* | MOSP | *Montastrea species* |
| AGRA | *Acropora granulosa* | MVAL | *Montastrea valenciennesi* |
| AHUM | *Acropora humilis* | MACA | *Montipora acanthella* |
| ALAT | *Acropora latistella* | MCAL | *Montipora caliculata* |
| AMON | *Acropora monticulosa* | MDAN | *Montipora danae* |
| AMUL | *Acropora multiacuta* | MEFF | *Montipora efflorescens* |
| **AMUR** | ***Acropora muricata*** | MFLO | *Montipora floweri* |
| APAL | *Acropora palmerae* | MFOV | *Montipora foveolata* |
| APAN | *Acropora paniculata* | MGRI | *Montipora grisea* |
| APOL | *Acropora polystoma* | MHOF | *Montipora hoffmeisteri* |
| **APUL** | ***Acropora* cf. *pulchra*** | MINF | *Montipora informis* |
| AQUE | *Acropora quelchii* | MMON | *Montipora monasteriata* |
| ASEC | *Acropora secale* | MMYR | *Montipora myriophthalma* |
| ASEL | *Acropora selago* | MOPL | *Montipora planiuscula* |
| ASPE | *Acropora species* | MONS | *Montipora species* |
| ASUR | *Acropora surculosa* | MSTU | *Montipora studeri* |
| ALSP | *Alveopora species* | MNTU | *Montipora tuberculosa* |
| ASUP | *Alveopora superficialis* | MVEN | *Montipora venosa* |
| AVIR | *Alveopora viridis* | MOVE | *Montipora verrucosa* |
| AELI | *Astreopora elliptica* | MVER | *Montipora verrucosa* |
| AGRC | *Astreopora gracilis* | MYSP | *Mycedium species* |
| ALIS | *Astreopora listeri* | OCRI | *Oulophyllia crispa* |
| AMYR | *Astreopora myriopthalma* | PSPE | *Pachyseris speciosa* |
| AOCE | *Astreopora ocellata* | PBIP | *Pavona bipartita* |
| ARAN | *Astreopora randalli* | PCAC | *Pavona cactus* |
| ASSP | *Astreopora species* | PCHR | *Pavona chriquiensis* |
| ABOT | *bottlebrush Acropora* | PCLA | *Pavona clavus* |
| ABUS | *bushy Acropora* | **PDEC** | ***Pavona decussata*** |
| ACOR | *corymbose Acropora* | PDIF | *Pavona diffluens* |
| CCOL | *Coscinaraea columna* | PDIV* | *Pavona divaricata* |
| CEXE | *Coscinaraea exesa* | PDUE | *Pavona duerdeni* |
| COSP | *Coscinaraea species* | PEXP | *Pavona explanulata* |
| CCA | *Crustose Coralline Algae* | **PFRO*** | ***Pavona frondifera*** |
| CTSP | *Ctenactis species* | PMAL | *Pavona maldivensis* |
| CYSP | *Cycloseris species* | PMIN | *Pavona minuta* |
| CMIC | *Cyphastrea microphthalma* | PASP | *Pavona species* |
| CSER | *Cyphastrea serailia* | PVAR | *Pavona varians* |
| CSPE | *Cyphastrea species* | PVEN | *Pavona venosa* |
| ADGT | *digitate Acropora* | PESP | *Pectinia species* |
| DHEL | *Diploastrea heliopora* | PDAE | *Platygyra daedalea* |
| DGRA | *Distichopora gracilis* | PPIN | *Platygyra pini* |
| EASP | *Echinophyllia aspera* | PGSP | *Platygyra species* |
| EECH | *Echinophyllia echinata* | PLSP | *Plerogyra species* |
| ECSP | *Echinophyllia species* | PVER | *Plesiastrea versipora* |
| ELAM | *Echinopora lemellosa* | PANK | *Pocillopora ankeli* |
| ECRI | *Euphyllia cristata* | **PDAM** | ***Pocillopora damicornis*** |
| EGLA | *Euphyllia glabrescens* | PDAN | *Pocillopora danae* |
| EPAR | *Euphyllia paraancora* | PELE | *Pocillopora elegans* |
| EUSP | *Euphyllia species* | PEYD | *Pocillopora eydouxi* |
| FFAV | *Favia favus* | PLIG | *Pocillopora ligulata* |
| FHEL | *Favia helianthoides* | PMEA | *Pocillopora meandrina* |
| FMAR | *Favia maritima* | PNEU | *Pocillopora neudeckeri* |
| FMAT | *Favia matthai* | PSET | *Pocillopora setchelli* |
| FPAL | *Favia pallida* | POSP | *Pocillopora species* |
| FROT | *Favia rotundata* | POVE | *Pocillopora verrucosa* |
| FASP | *Favia species* | PWOO | *Pocillopora woodjonesi* |
| FSTE | *Favia stelligera* | POLS | *Polyphyllia species* |
| FABD | *Favites abdita* | **PANN** | ***Porites annae*** |
| FFLE | *Favites flexuosa* | PAUS | *Porites australiensis* |
| FRUS | *Favites russelli* | POBR | *Porites branching* |
| FAVS | *Favites species* | POCO | *Porites columnar* |
| FMA | *Fleshy Macroalgae* | PCON | *Porites convexa* |
| FUSP | *Fungia species* | **PCYL** | ***Porites cylindrica*** |
| GFAS | *Galaxea fascicularis* | PDEN | *Porites densa* |
| GHOR | *Galaxea horrescens* | PHOR | *Porites horizontalata* |
| GLON | *Galaxea longisepta* | PLUT | *Porites lutea* |
| GASP | *Galaxea species* | PMON | *Porites monticulosa* |
| GPLA | *Gardineroseris planulata* | PMOR | *Porites mordax* |
| GEDW | *Goniastrea edwardsii* | **PRUS** | ***Porites rus*** |
| GPEC | *Goniastrea pectinata* | PORS | *Porites species* |
| **GRET** | ***Goniastrea retiformis*** | PSUP | *Porites superfusa* |
| GSPE | *Goniastrea species* | PVAU | *Porites vaughani* |
| GFRU | *Goniopora fruticosa* | **PSCO** | ***Psammocora contigua*** |
| GMIN | *Goniopora minor* | PDIG | *Psammocora digitata* |
| GSOM | *Goniopora somaliensis* | PHAI | *Psammocora haimeana* |
| HASP | *Halomitra species* | POBT | *Psammocora obtusangula* |
| HCOE | *Heliopora coerulea* | PSSP | *Psammocora species* |
| HESP | *Herpolitha species* | PSTE | *Psammocora stellata* |
| HEXE | *Hydnophora exesa* | SASP | *Sandolitha species* |
| HEXP | *Hydnophora expansa* | SCYL | *Scapophyllia cylindrica* |
| HMIC | *Hydnophora micrococonos* | SCOS | *Scolymia species* |
| HYSP | *Hydnophora species* | SACU | *Seriatopora aculeus* |
| IPAL | *Isopora palifera* | SHYS | *Seriatopora hystrix* |
| **LPUR** | ***Leptastrea purpurea*** | SESP | *Seriatopora species* |
| LESP | *Leptastrea species* | ASTA | *staghorn Acropora* |
| LTRA | *Leptastrea transversa* | SARM | *Stylocoeniella armata* |
| LPHR | *Leptoria phrygia* | SGUE | *Stylocoeniella guentheri* |
| LEXP | *Leptoseris explanata* | STYS | *Stylocoeniella species* |
| LFOL | *Leptoseris foliosa* | SMOR | *Stylophora mordax* |
| LGAR | *Leptoseris gardineri* | STPI | *Stylophora pistillata* |
| LHAW | *Leptoseris hawaiiensis* | STSP | *Stylophora species* |
| LINC | *Leptoseris incrustans* | SVAL | *Symphyllia valenciennesii* |
| LMYC | *Leptoseris mycetoseroides* | ATAB | *tabular Acropora* |
| LSCA | *Leptoseris scabra* | TAUR | *Tubastreae aurea* |
| LSOL | *Leptoseris solida* | TMUS | *Tubipora musica* |
| LEPS | *Leptoseris species* | TREN | *Turbinaria reniformis* |
| LISP | *Lithophyllum species* | TSTE | *Turbinaria stellulata* |
| LCOR | *Lobophyllia corymbosa* | TURS | *Turbinaris psecies* |
| LFLA | *Lobophyllia flabelliformis* |  |  |
| *Note: Highlighting the difficulty of coral species identification in Micronesia, the coral health database used in analysis listed *Pavona frondifera (*PFRO)*, a rare coral species in Guam,* as being regularly observed with active WS lesions. The species classification of PFRO was later corrected after analysis to *Pavona divaricata* (PDIV)*.* It is unlikely that PFRO was observed during the recorded surveys and all notations of PFRO should be considered as observations of PDIV. These changes do not impact analysis results. | | | |
